# Supplementary material for: A proteomic approach to the development of DIVA ELISA distinguishing pigs infected with Salmonella Typhimurium and pigs vaccinated with a Salmonella Typhimurium-based inactivated vaccine
Source: PubMed Central journal article supplement (PMC5106837; doi:10.1186/s12917-016-0879-1), 2016-11-11

**Supplementary Fig. 1** Coomassie-stained gels and western blots of recombinant proteins. Time scale expression is shown in hours post induction (0 - 5 hours, ON - overnight). Arrows indicate the expected molecular weight of a product.

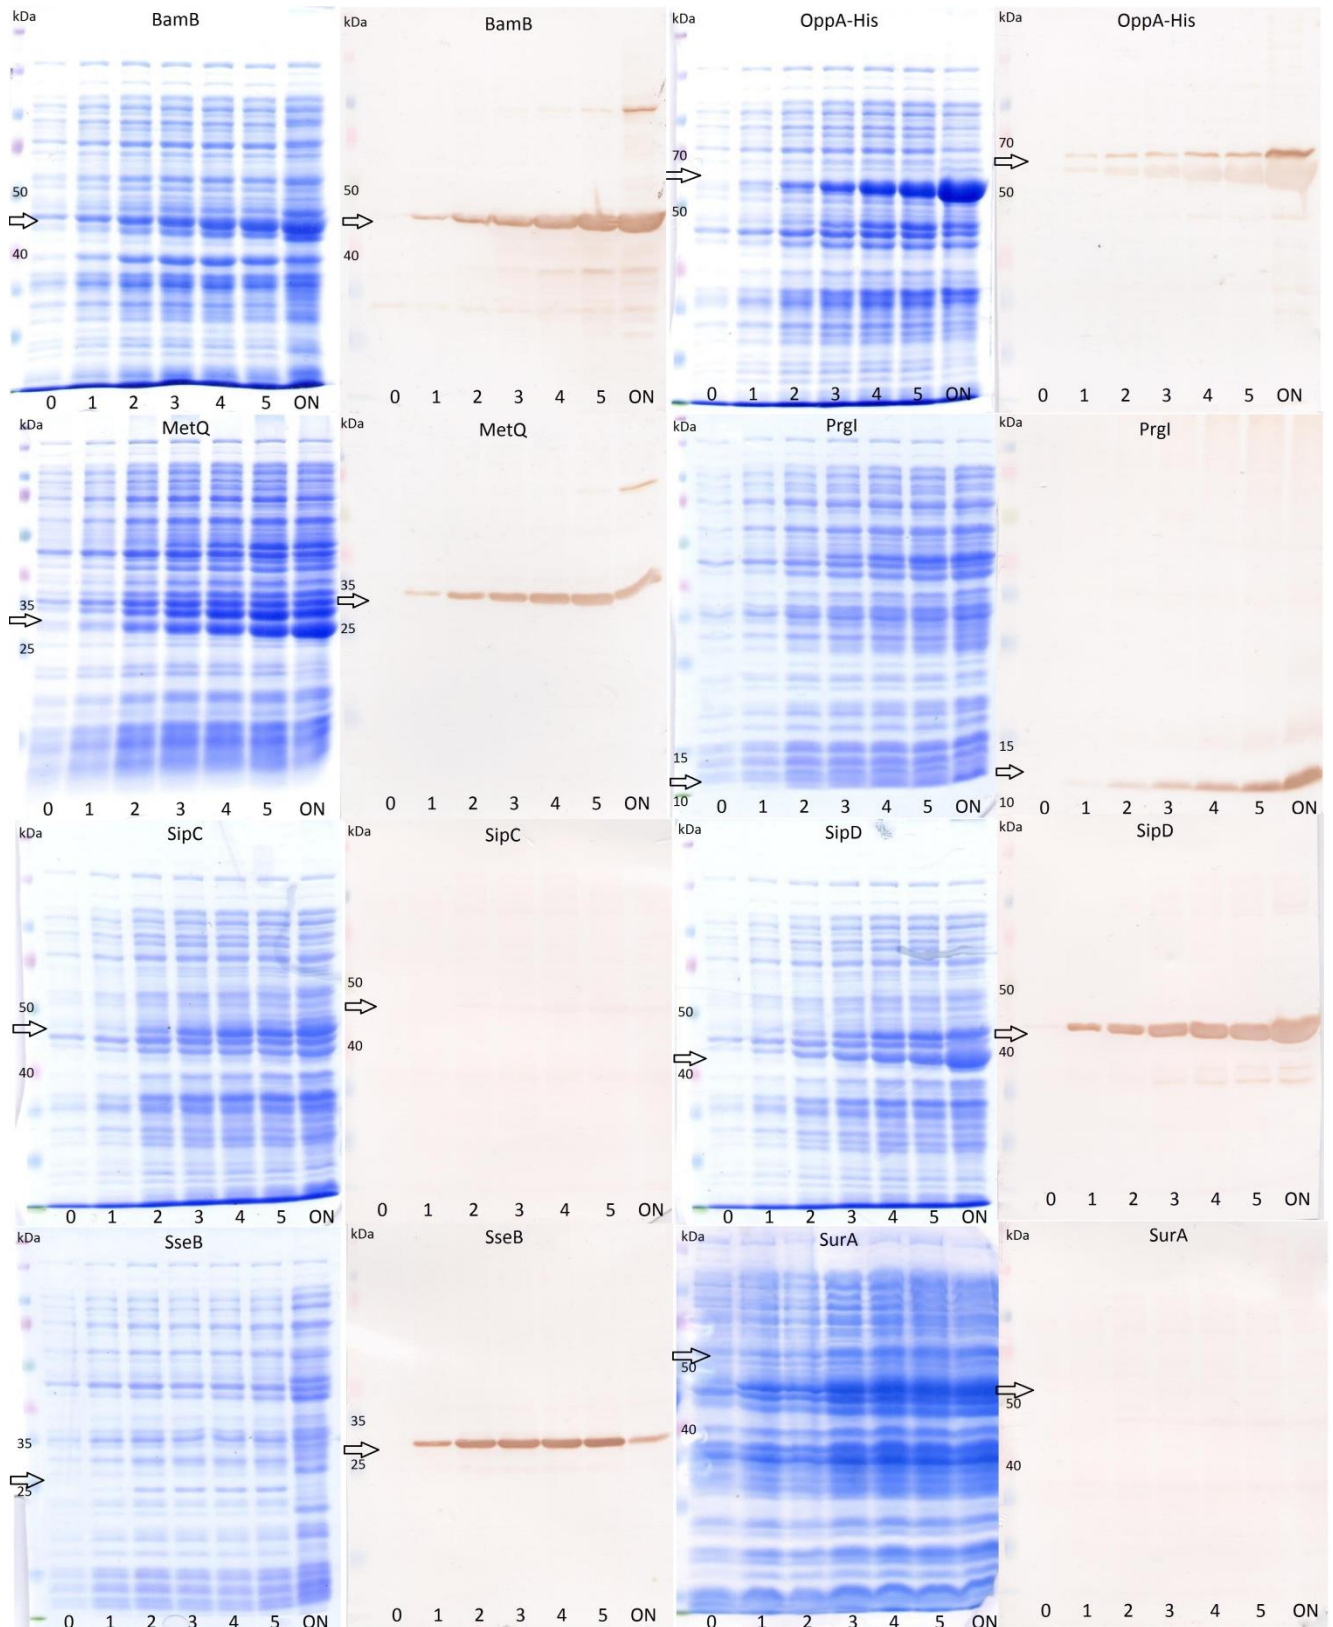

**Supplementary Fig. 2** The time course of IgM antibody response to SipB protein and to Salmonella LPS after the infection. The connecting lines determine the average of five animals randomly selected from each group.

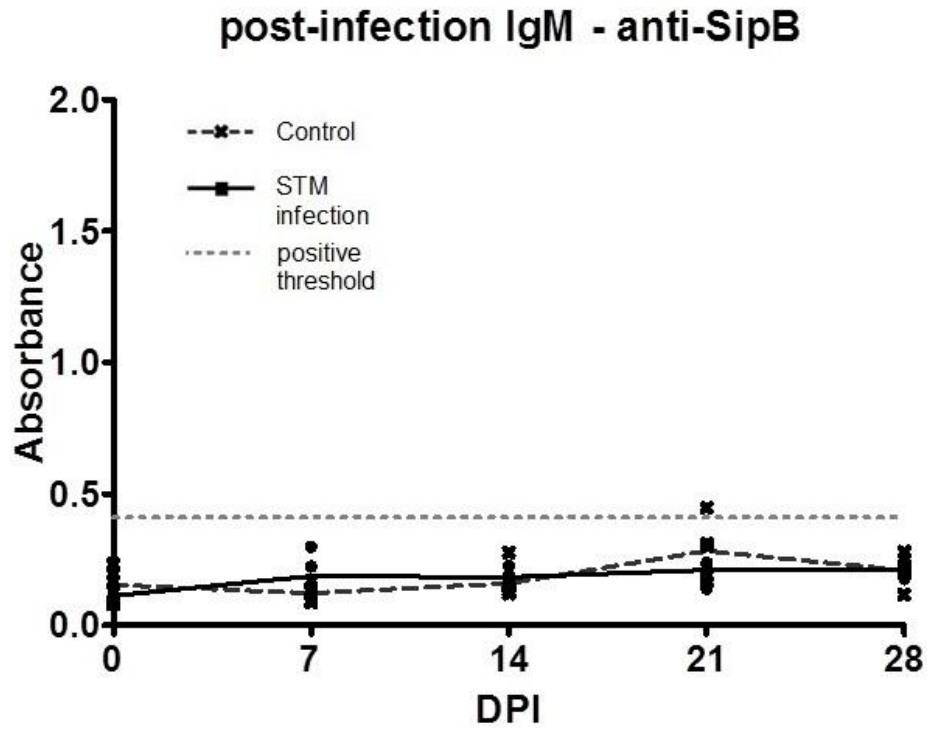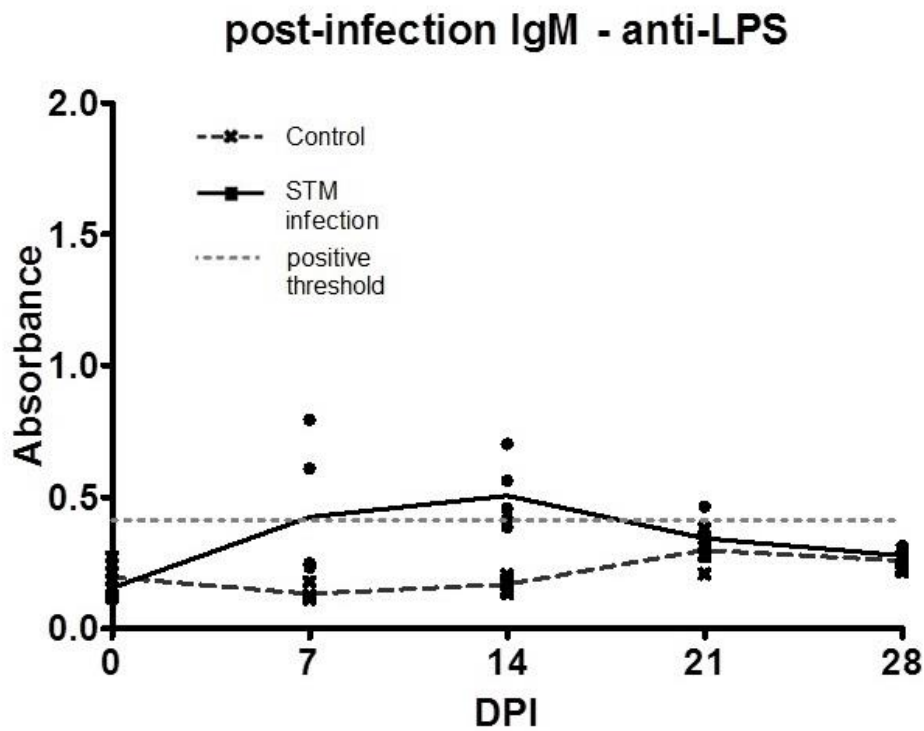

Supplement: 12917_2016_879_MOESM1_ESM.pdf [file 12917_2016_879_MOESM1_ESM.pdf]
